# Supplementary material for: A population model for genotyping indels from next-generation sequence data
Source: PubMed Central journal article supplement — Nucleic Acids Res. 2012 Dec 5;41(3):e46. doi: 10.1093/nar/gks1143 (PMC3562001; doi:10.1093/nar/gks1143), 2012-12-05
Supplement: supp_gks1143_nar-01344-met-n-2012-File004.pdf [file supp_gks1143_nar-01344-met-n-2012-File004.pdf]

# Supplementary Material

## SUPPLEMENTARY FIGURES AND TABLES

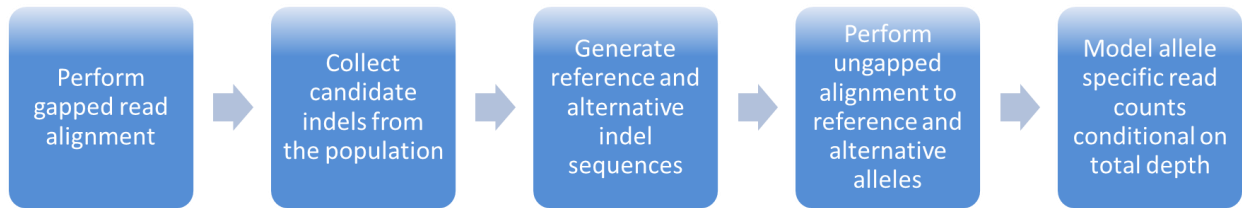

**Supplementary Figure S1:** SOAP-popIndel workflow

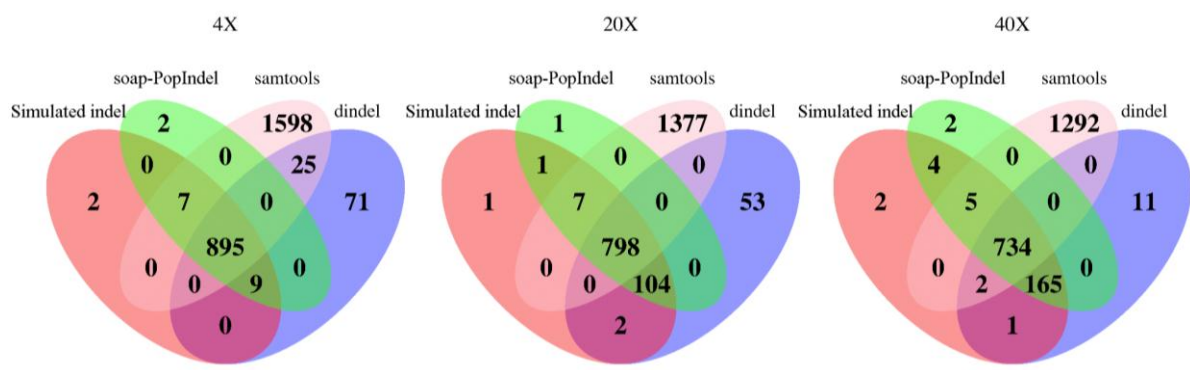

**Supplementary Figure S2:** Venn diagram illustrating overlaps between indel sites called by different algorithms with true indels on simulated data at different levels of coverage. Panel A: 4x average coverage; Panel B: 20x average coverage; panel C: 40x average coverage.

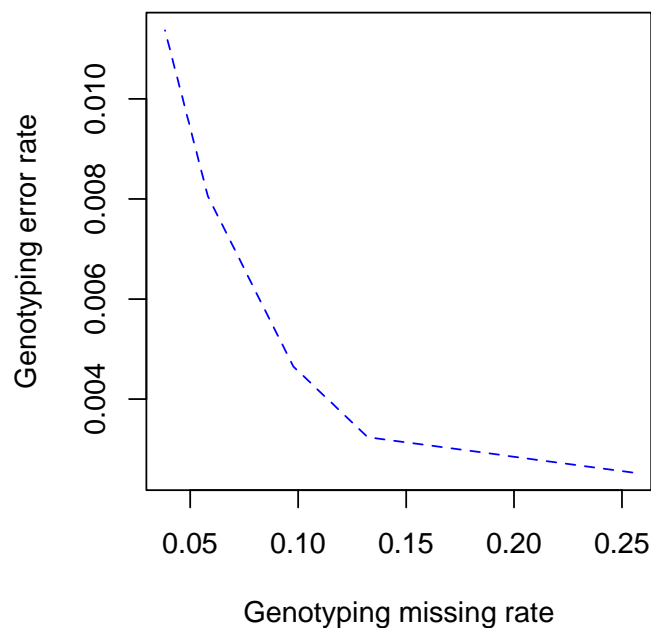

**Supplementary Figure S3:** Genotyping accuracy and missing rates on triploid 40X simulation data.

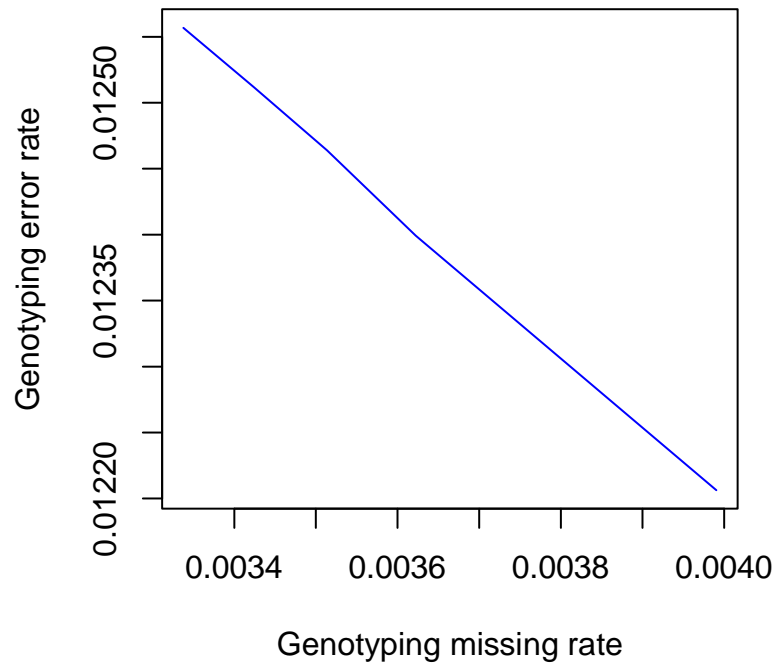

**Supplementary Figure S4:** Genotyping accuracy and missing rates on tri-allelic diploid 40X simulated data.

| Method        | Depth | Time(sec) | Memory(GB) |
|---------------|-------|-----------|------------|
| SAMtools      | 4X    | 18816     | 0.2        |
|               | 20X   | 98168     | 0.22       |
|               | 40X   | 138810    | 0.24       |
| Dindel        | 4X    | 120176    | 0.1        |
|               | 20X   | 501957    | 0.12       |
|               | 40X   | 1451184   | 1          |
| SOAP-popIndel | 4X    | 3456      | 2          |
|               | 20X   | 4149      | 2.5        |
|               | 40X   | 5078      | 4          |
| PiCall        | 4X    | 356594    | 0.14       |
|               | 20X   | 550223    | 0.18       |
|               | 40X   | 579355    | 0.22       |

**Supplementary Table S1.** Running time on simulation data.

| Frequency | Genotyping error rate | Genotyping missing rate |
|-----------|-----------------------|-------------------------|
| 5%        | 0.22%                 | 0.16%                   |
| 10%       | 0.34%                 | 0.13%                   |
| 20%       | 0.42%                 | 0.16%                   |
| 50%       | 1.45%                 | 0.17%                   |
| 80%       | 0.17%                 | 0.16%                   |
| 90%       | 1.33%                 | 0.12%                   |
| 95%       | 0.10%                 | 0.12%                   |

**Supplementary Table S2.** Error rate and missing rate by indel allele frequency for simulated diploid 40X data.

| Inferred genotype | Simulated genotype |        |        |        |
|-------------------|--------------------|--------|--------|--------|
|                   | AAA                | AAB    | ABB    | BBB    |
| AAA               | 0.31               | 8.8e-4 | 1.1e-6 | 0      |
| AAB               | 1.8e-4             | 0.16   | 3.6e-3 | 3.3e-6 |
| ABB               | 5.5e-7             | 1.8e-3 | 0.15   | 1.9e-4 |
| BBB               | 0                  | 3.9e-6 | 5.7e-4 | 0.32   |
| Missing           | 2.6e-4             | 2.3e-2 | 3.4e-2 | 1.6-e3 |

**Supplementary Table S3.** Triploid genotyping summary, showing the percentage of total indel genotypes categorized by simulated and inferred genotype. The cells in the table sum to 1.

| Tri-allelic diploid | False negative rate | False positive rate |
|---------------------|---------------------|---------------------|
| 40X                 | 3.18%               | 0.34%               |

**Supplementary Table S4.** False negative rate and false positive rate for detecting indels on tri-allelic diploid simulated data.

## SUPPLEMENTARY METHODS

### Pre-filtering of putative indel sites

For the medium or high depth data (including the analysis of real data), we first filtered putative indels sites with average depth lower than 4. We then filtered sites for which more than 66% of putative heterozygous indel sites (i.e. those which had greater than one aligned reference and one aligned indel read) were more consistent with genotyping error than genuine genetic variation. To achieve this we compared the probability that each putative heterozygous allele count was generated from an error model represented by the binomial distribution  $B(n, 0.1)$  with 10% error rate, to the probability that it was generated by a genuine heterozygous model with no error  $B(n, 0.5)$ .

### Sequenom validation

Indel genotyping assays were performed via iPLEX MassARRAY system (Sequenom Inc., San Diego). Both PCR and MassEXTEND primers for each mutations were *in silico* designed by MassARRAY Assay design 4.0 software. Multiplex PCR were carried out by GeneAmp PCR System 9700 Dual 384-Well Sample Block Module (Applied Biosystems), followed by dephosphorylation, single base extension reaction and desalting. MassARRAY Nanodispenser RS1000 (Sequenom) was used to automatically spot reactions to 384 SpectroCHIP, which was further placed into the MALDI-TOF mass spectrometer (Sequenom). All genotype calls by MassARRAY Typer 4.0 (Sequenom) were manually confirmed by examining the spectra for each assay and sample. Peaks for two alleles were checked against the background of each well and a mutation call was confirmed if the peak is unique to that allele.
